# Supplementary material for: The importance of combining serological testing with RT-PCR assays for efficient detection of COVID-19 and higher diagnostic accuracy
Source: PeerJ. 2023 Apr 11;11:e15024. doi: 10.7717/peerj.15024 (PMC10103696; doi:10.7717/peerj.15024)
Supplement: Table S1 [file peerj-11-15024-s001.docx]

**Supplementary Tables**

**Table S1. Characteristics of study participants**

| **Characteristic** | **Category** | **Number of participants**  **n (%)** |
| --- | --- | --- |
| **overall** |  | **9** |
| **Gendera** | Male  Female | 1 (11.1%)  8 (88.8%) |
| **Ageb** | 37.2 ± 9.78 | |
| **Professional categorya** | HCW | 9 (100%) |
| **In contact with patientsa** | Yes  No | 7 (77.7%)  2 (22.22%) |
| **In contact with COVID-19 confirmed casesa** | Yes | 9 (100%) |
| **Diagnosed previously with COVID-19a** | No | 9 (100%) |
| an (column percentage).  bMean ± SD | | |
